# Supplementary material for: Comprehensively understanding the steric hindrance effect on the coordination sphere of Pb2+ ions and photophysical nature of two luminescent Pb(ii)-coordination polymers
Source: Royal Society of Chemistry journal article supplement (doi:10.1039/c9dt02928a), 2019-01-01
Supplement: c9dt02928a1.pdf [file c9dt02928a1.pdf]

## Supplementary Information

### **Comprehensively understanding the steric hindrance effect on coordination sphere of Pb<sup>2+</sup> ion and photophysical natures of two luminescent Pb(II)-coordination polymers**

Xiao-Shuo Wu,<sup>a</sup> Yue-Rou Tang<sup>b</sup>, Jian-Lan Liu,<sup>\*a</sup> Lifeng Wang,<sup>c</sup> Xiao-Ming Ren<sup>\*a,d</sup>

<sup>a</sup> State Key Laboratory of Materials-Oriented Chemical Engineering and College of Chemistry and Molecular Engineering, Nanjing Tech University, Nanjing 211816, P. R. China

<sup>b</sup> American Division, Nanjing Jinling High school, Nanjing 210009, PR China

<sup>c</sup> Institute for Frontier Materials (IFM), Deakin University, 75 Pigdons Road, Waurn Ponds, Victoria 3216, Australia

<sup>d</sup> State Key Laboratory of Coordination Chemistry, Nanjing University 210023, P. R. China

Tel: +86-25-58139476

E-mail: [xmren@njtech.edu.cn](mailto:xmren@njtech.edu.cn)

## Contents

Table S1: Bond lengths (Å) and bond angles (°) in coordination polyhedra of **1**.

Table S2: Bond lengths (Å) and bond angles (°) in coordination polyhedra of **2**.

Fig. S1: IR spectrum of **1**: the sharp bands at 3443 and 3313  $\text{cm}^{-1}$  are attributed to the  $\nu_{\text{asymmetric}}$  and  $\nu_{\text{symmetric}}$  stretching vibrations of N-H in  $-\text{NH}_2$  groups, respectively. The bands at 1610, 1569, 1534 and 1462  $\text{cm}^{-1}$  correspond to the stretching vibrations of C=C and C=N bonds in pyridyl ring and the  $\nu_{\text{asymmetric}}$  stretching vibrations of carboxylate groups. The intense band at 1385  $\text{cm}^{-1}$  is attributed to the  $\nu_{\text{symmetric}}$  stretching vibrations of carboxylate groups.

Fig. S2: IR spectrum of **2**: the broad bands at 3450 and 3168  $\text{cm}^{-1}$  are caused by the O-H stretching vibrations in the coordinated  $\text{H}_2\text{O}$  and the hydroxyl groups forming the hydrogen bonds, respectively. The bands at 1603, 1580, 1545 and 1462  $\text{cm}^{-1}$  correspond to the stretching vibrations of C=C and C=N bonds in quinoline ring and the  $\nu_{\text{asymmetric}}$  stretching vibrations of carboxylate groups. The symmetric stretching vibrations of carboxylate groups appeared at 1402  $\text{cm}^{-1}$ . These IR spectra are in good agreement with the results of X-ray single crystal structure analysis and the coordination modes of ligands.

Fig. S3: Connection fashion of 2-anc ligands in **1**.

Fig. S4: Intramolecular hydrogen bonding interactions in **2**.

Fig. S5: Connection fashion of 3-qlc ligands in **2**.

Fig. S6: PXRD patterns of **1** immersed in water for 24 hours.

Fig. S7: Images of 2-aminonicotinic acid under (a) daylight and (b) UV light.

Fig. S8: Images of crystals of **1** under (a) daylight and (b) UV light.

Fig. S9: Images of 3-quinolinecarboxylic acid under (a) daylight and (b) UV light.

Fig. S10: Images of crystals of **2** under (a) daylight and (b) UV light.

Fig. S11: Emission decay curves at room temperature upon pulsed excitation at 360

nm and the main emission peak at 410 nm of **1**.

Fig. S12: Emission decay curves at room temperature upon pulsed excitation at 370 nm and the main emission peak at 548 nm of **1**.

Fig. S13: Emission decay curves at room temperature upon pulsed excitation at 360 nm and the main emission peak at 430 nm of **2**.

Fig. S14: Emission decay curves at room temperature upon pulsed excitation at 360 nm and the main emission peak at 460 nm of 2-aminonicotinic acid.

Fig. S15: Emission decay curves at room temperature upon pulsed excitation at 360 nm and the main emission peak at 430 nm of 3-quinolinecarboxylic acid.

Fig. S16: (a) Close-up view of several highest occupied band and the lowest unoccupied bands in energy band structure of **1** (b) Plots of DOS and PDOS of Pb, O, N and C atoms in **1**.

Fig. S17: (a) Close-up view of several highest occupied band and the lowest unoccupied bands in energy band structure of **2** (b) Plots of DOS and PDOS of Pb, O, N and C atoms in **2**.

Table S1: Bond lengths (Å) and bond angles (°) in coordination polyhedra of **1**



|               |            |             |            |               |            |
|---------------|------------|-------------|------------|---------------|------------|
| Pb1-O1        | 2.515(3)   | Pb1-O2      | 2.662(3)   | Pb1-N1        | 2.716(3)   |
| Pb1-O1#1      | 2.515(3)   | Pb1-O2#1    | 2.662(3)   | Pb1-N1#1      | 2.716(3)   |
| O1-Pb1-O1#1   | 73.92(14)  | O1-Pb1-O2#1 | 50.33(10)  | O1#1-Pb1-O2#1 | 118.91(10) |
| O1-Pb1-O2     | 118.91(10) | O1#1-Pb1-O2 | 50.33(10)  | O2#1-Pb1-O2   | 168.87(13) |
| O1-Pb1-N1     | 83.38(11)  | O1#1-Pb1-N1 | 89.15(11)  | O2#1-Pb1-N1   | 105.00(10) |
| O2-Pb1-N1     | 74.06(10)  | O1-Pb1-N1#1 | 89.15(11)  | O1#1-Pb1-N1#1 | 83.38(11)  |
| O2#1-Pb1-N1#1 | 74.06(10)  | O2-Pb1-N1#1 | 105.00(10) | N1-Pb1-N1#1   | 170.67(16) |

Symmetry transformations used to generate equivalent atoms: #1 = -x+3/2, -y+1/2, z

Table S2: Bond lengths (Å) and bond angles (°) in coordination polyhedra of **2**



|        |          |            |          |        |          |
|--------|----------|------------|----------|--------|----------|
| Pb1-O2 | 2.570(4) | Pb1-O(4)#1 | 2.596(4) | Pb1-O4 | 2.610(5) |
|--------|----------|------------|----------|--------|----------|

|             |            |               |            |             |            |
|-------------|------------|---------------|------------|-------------|------------|
| Pb1-O1      | 2.611(4)   | Pb1-O3        | 2.647(5)   | Pb1-O2#2    | 2.649(4)   |
| Pb1-O5      | 2.669(5)   | Pb1-O6        | 2.716(6)   | O2-Pb1-O1   | 50.20(13)  |
| O2-Pb1-O4#1 | 71.04(14)  | O2-Pb1-O4     | 105.32(18) | O4#1-Pb1-O4 | 118.03(17) |
| O4#1-Pb1-O1 | 121.23(14) | O4#1-Pb1-O2#2 | 160.12(17) | O2-Pb1-O2#2 | 126.52(17) |
| O1-Pb1-O3   | 91.21(19)  | O4-Pb1-O3     | 49.2414    | O4#1-Pb1-O3 | 71.53(16)  |
| O4-Pb1-O1   | 80.94(16)  | O2-Pb1-O3     | 75.88(17)  | O1-Pb1-O2#2 | 77.09(15)  |
| O4-Pb1-O2#2 | 69.60(14)  | O3-Pb1-O2#2   | 118.83(13) | O2-Pb1-O5   | 84.11(17)  |
| O4-Pb1-O6   | 74.24(19)  | O4#1-Pb1-O6   | 91.17(15)  | O2-Pb1-O6   | 159.88(18) |
| O2#2-Pb1-O5 | 91.06(14)  | O3-Pb1-O5     | 149.96(14) | O1-Pb1-O5   | 92.94(17)  |
| O4-Pb1-O5   | 160.54(15) | O4#1-Pb1-O5   | 80.96(16)  | O1-Pb1-O6   | 146.04(15) |
| O3-Pb1-O6   | 89.9(2)    | O2#2-Pb1-O6   | 72.76(17)  | O5-Pb1-O6   | 102.8(2)   |

Symmetry transformations used to generate equivalent atoms: #1 =  $x, -y+1/2, z-1/2$ ; #2 =  $x, -y+1/2, z+1/2$



Fig. S1: IR spectrum of **1**: the sharp bands at 3443 and 3313  $\text{cm}^{-1}$  are attributed to the  $\nu_{\text{asymmetric}}$  and  $\nu_{\text{symmetric}}$  stretching vibrations of N-H in  $-\text{NH}_2$  groups, respectively. The

bands at 1610, 1569, 1534 and 1462  $\text{cm}^{-1}$  correspond to the stretching vibrations of C=C and C=N bonds in pyridyl ring and the  $\nu_{\text{asymmetric}}$  stretching vibrations of carboxylate groups. The intense band at 1385  $\text{cm}^{-1}$  is attributed to the  $\nu_{\text{symmetric}}$  stretching vibrations of carboxylate groups.



Fig. S2: IR spectrum of **2**: the broad bands at 3450 and 3168  $\text{cm}^{-1}$  are caused by the O-H stretching vibrations in the coordinated  $\text{H}_2\text{O}$  and the hydroxyl groups forming the hydrogen bonds, respectively. The bands at 1603, 1580, 1545 and 1462  $\text{cm}^{-1}$  correspond to the stretching vibrations of C=C and C=N bonds in quinoline ring and the  $\nu_{\text{asymmetric}}$  stretching vibrations of carboxylate groups. The symmetric stretching vibrations of carboxylate groups appeared at 1402  $\text{cm}^{-1}$ . These IR spectra are in good agreement with the results of X-ray single crystal structure analysis and the coordination modes of ligands.



Fig. S3: Connection fashion of 2-anc ligands in **1**.



Fig. S4: Intramolecular hydrogen bonding interactions in **2**.



Fig. S5: Connection fashion of 3-qlc ligands in **2**.



Fig. S6: PXRD patterns of **1** immersed in water for 24 hours.



Fig. S7: Images of 2-aminonicotinic acid under (a) daylight and (b) UV light.



Fig. S8: Images of crystals of **1** under (a) daylight and (b) UV light.



Fig. S9: Images of 3-quinolinecarboxylic acid under (a) daylight and (b) UV light.



Fig. S10: Images of crystals of **2** under (a) daylight and (b) UV light.



Fig. S11: Emission decay curves at room temperature upon pulsed excitation at 360 nm and the main emission peak at 410 nm of **1**.



Fig. S12: Emission decay curves at room temperature upon pulsed excitation at 370 nm and the main emission peak at 548 nm of **1**.



Fig. S13: Emission decay curves at room temperature upon pulsed excitation at 360 nm and the main emission peak at 430 nm of **2**.



Fig. S14: Emission decay curves at room temperature upon pulsed excitation at 360 nm and the main emission peak at 460 nm of 2-aminonicotinic acid.



Fig. S15: Emission decay curves at room temperature upon pulsed excitation at 360 nm and the main emission peak at 430 nm of 3-quinolinecarboxylic acid.



Fig. S16: (a) Close-up view of several highest occupied band and the lowest unoccupied bands in energy band structure of **1**. (b) Plots of DOS and PDOS of Pb, O, N and C atoms in **1**.



Fig. S17: (a) Close-up view of several highest occupied band and the lowest unoccupied bands in energy band structure of **2**. (b) Plots of DOS and PDOS of Pb, O, N and C atoms in **2**.
